# Supplementary material
Source: PubMed Central journal article supplement (PMC3417242)
Supplement: NIHMS390943-supplement-1_si_001.pdf [file NIHMS390943-supplement-1_si_001.pdf]

# Structure-based Design of Potent Bcl-2/Bcl-xL Inhibitors with Strong *in vivo* Antitumor Activity

*Haibin Zhou*<sup>+</sup>, *Angelo Aguilar*<sup>+</sup>, *Jianfang Chen*<sup>+</sup>, *Longchuan Bai*<sup>+</sup>, *Jennifer L. Meagher*<sup>#</sup>, *Liu Liu*<sup>+</sup>, *Chao-Yie Yang*<sup>+</sup>, *Donna McEachern*<sup>+</sup>, *Xin Cong*<sup>+</sup>,  
*Jeanne A. Stuckey*<sup>#€</sup>, *Shaomeng Wang*<sup>+</sup>

<sup>+</sup>Comprehensive Cancer Center and Departments of Internal Medicine,  
Pharmacology and Medicinal Chemistry, and <sup>#</sup>Life Sciences Institute, University  
of Michigan, 1500 E. Medical Center Drive, Ann Arbor, MI 48109-0934, USA

## **Table of Contents:**

- I. Figure S1 (S2)
- II. Table S1 (S3)
- III. Table S2 (S4)
- IV. Figures S2-10 (S5-S13)
- V. References (S14)

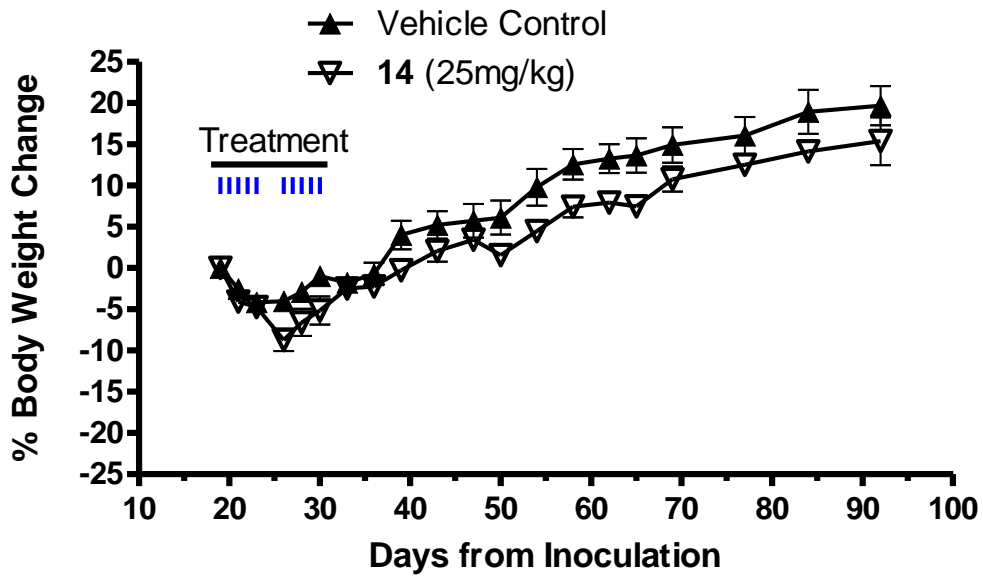

**Figure S1.** Animal weight change for each group as compared to the animal weights before the start of the treatment.

**Table S1:** Data Collection and Refinement Statistics

| <b>Data Collection</b>        | <b>Bcl-xL-12</b>                              |
|-------------------------------|-----------------------------------------------|
| Space Group                   | P2 <sub>1</sub> 2 <sub>1</sub> 2 <sub>1</sub> |
| Unit Cell a, b, c (Å)         | 41.627, 54.891, 79.569                        |
| Wavelength (Å)                | 0.97857                                       |
| Resolution (Å) <sup>1</sup>   | 1.4 (1.42 – 1.4)                              |
| Rsym (%) <sup>2</sup>         | 5.3 (45.8)                                    |
| <I/sI> <sup>3</sup>           | 20 (5)                                        |
| Completeness (%) <sup>4</sup> | 94.5 (91.2)                                   |
| Redundancy                    | 7.0 (7.0)                                     |
| <b>Refinement</b>             |                                               |
| Resolution (Å)                | 1.4                                           |
| R-Factor (%) <sup>5</sup>     | 0.1641                                        |
| Rfree (%) <sup>6</sup>        | 0.1847                                        |
| Protein atoms                 | 1271                                          |
| Water Molecules               | 175                                           |
| Unique Reflections            | 34821                                         |
| R.m.s.d. <sup>7</sup>         |                                               |
| Bonds                         | 0.01                                          |
| Angles                        | 0.97                                          |
| MolProbity Score <sup>8</sup> | 4.97                                          |
| Clash Score <sup>8</sup>      | 1.4                                           |
| RSR of compound <sup>9</sup>  | 0.061                                         |
| RSCC of compound <sup>9</sup> | 0.972                                         |
| PDB ID                        | 3SP7                                          |

<sup>1</sup>Statistics for highest resolution bin of reflections in parentheses.

<sup>2</sup> $R_{\text{sym}} = \sum_h \sum_j |I_{hj} - \langle I_h \rangle| / \sum_h \sum_j I_{hj}$ , where  $I_{hj}$  is the intensity of observation  $j$  of reflection  $h$  and  $\langle I_h \rangle$  is the mean intensity for multiple recorded reflections.

<sup>3</sup>Intensity signal-to-noise ratio.

<sup>4</sup>Completeness of the unique diffraction data.

<sup>5</sup> $R\text{-factor} = \sum_h |IF_oI - IF_cI| / \sum_h IF_oI$ , where  $F_o$  and  $F_c$  are the observed and calculated structure factor amplitudes for reflection  $h$ .

<sup>6</sup> $R_{\text{free}}$  is calculated against a 10% random sampling of the reflections that were removed before structure refinement.

<sup>7</sup>Root mean square deviation of bond lengths and bond angles.

<sup>8</sup>Molprobity Server.<sup>1</sup>

<sup>9</sup>Predeposition Electron Density Server.<sup>2</sup>

**Table S2:** Purity data of all the biologically evaluated compounds.

| <b>Compound</b> | <b>Retention time, <math>t_R</math> (min)</b> | <b>% purity</b> |
|-----------------|-----------------------------------------------|-----------------|
| <b>8</b>        | 3.64                                          | > 99            |
| <b>9</b>        | 4.40                                          | 97              |
| <b>10</b>       | 4.18                                          | 98.5            |
| <b>11</b>       | 5.05                                          | 97.7            |
| <b>12</b>       | 5.05                                          | > 99            |
| <b>13</b>       | 6.01                                          | > 99            |
| <b>14</b>       | 5.26                                          | > 99            |
| <b>15</b>       | 5.41                                          | > 99            |
| <b>16</b>       | 5.32                                          | > 99            |

The purity of the biologically evaluated compounds was determined by Waters ACQUITY UPLC. The conditions of the UPLC were as follow:

Eluents: solvent A (0.1% of TFA in water) and solvent B (0.1% of TFA in CH<sub>3</sub>CN).

Column: ACQUITY UPLC BEH C18 column (2.1X50 mm, 1.7  $\mu$ m).

Method: 10% B to 100% B in 10 min.

Flow rate: 0.61 mL/min.

Detector: UV 254 nm

Run time: 10 min

**Figure S2.** UPLC analysis of compound **8**.

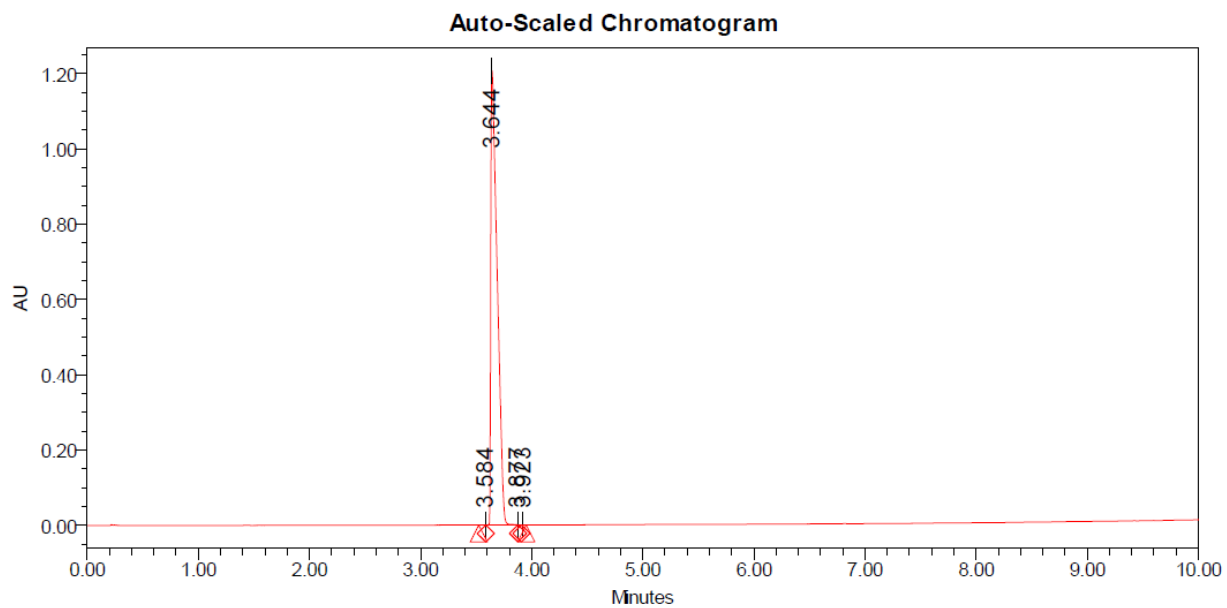

**Processed Channel:  
PDA 254.0 nm**

|   | Retention Time (min) | Area    | % Area |
|---|----------------------|---------|--------|
| 1 | 3.584                | 256     | 0.01   |
| 2 | 3.644                | 4815500 | 99.98  |
| 3 | 3.877                | 344     | 0.01   |
| 4 | 3.923                | 248     | 0.01   |

**Figure S3.** UPLC analysis of compound **9**.

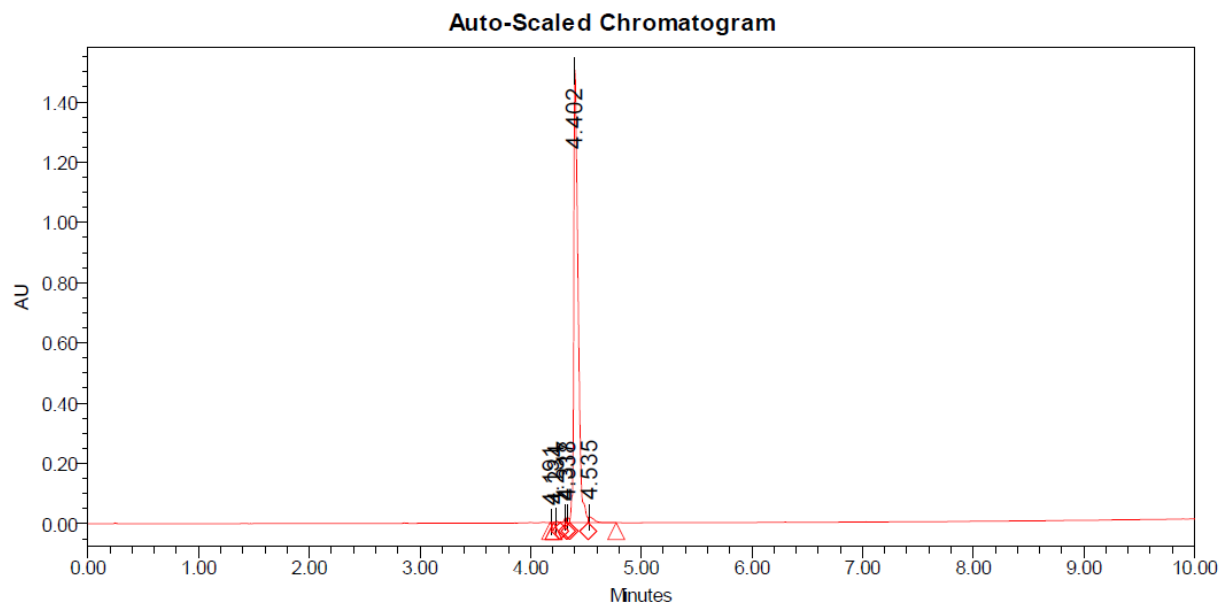

**Processed Channel:  
PDA 254.0 nm**

|   | Retention Time (min) | Area    | % Area |
|---|----------------------|---------|--------|
| 1 | 4.191                | 588     | 0.01   |
| 2 | 4.234                | 6838    | 0.16   |
| 3 | 4.317                | 25745   | 0.62   |
| 4 | 4.338                | 21326   | 0.51   |
| 5 | 4.402                | 4045704 | 97.00  |
| 6 | 4.535                | 70465   | 1.69   |

**Figure S4.** UPLC analysis of compound **10**.

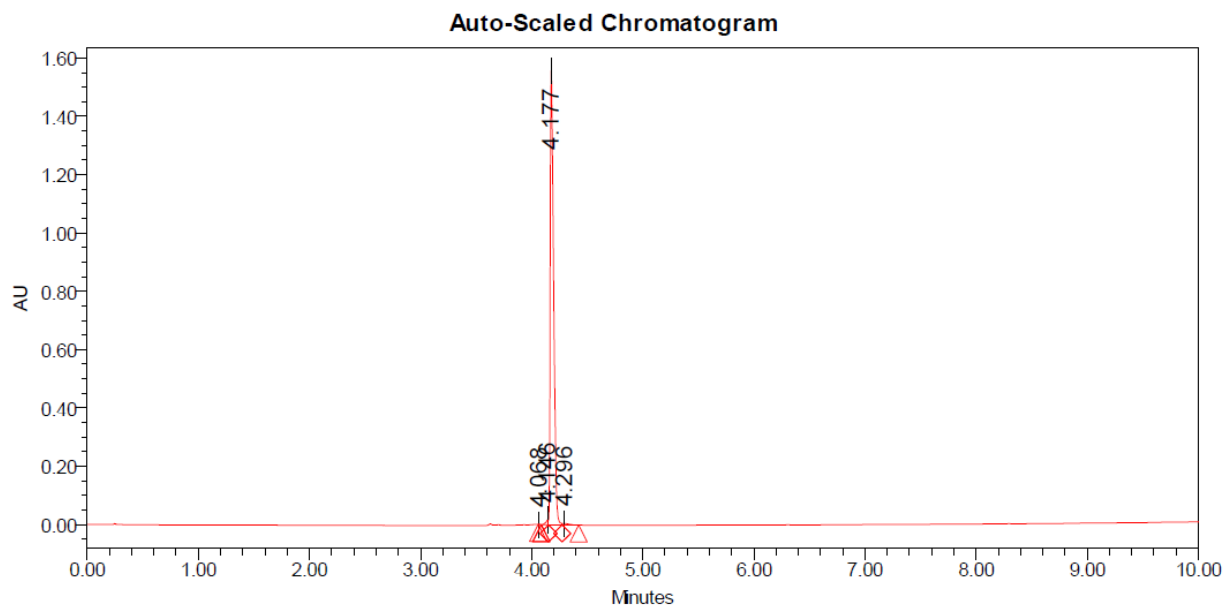

**Processed Channel:  
PDA 254.0 nm**

|   | Retention Time (min) | Area    | % Area |
|---|----------------------|---------|--------|
| 1 | 4.068                | 215     | 0.01   |
| 2 | 4.146                | 27480   | 0.81   |
| 3 | 4.177                | 3325686 | 98.54  |
| 4 | 4.296                | 21716   | 0.64   |

**Figure S5.** UPLC analysis of compound **11**.

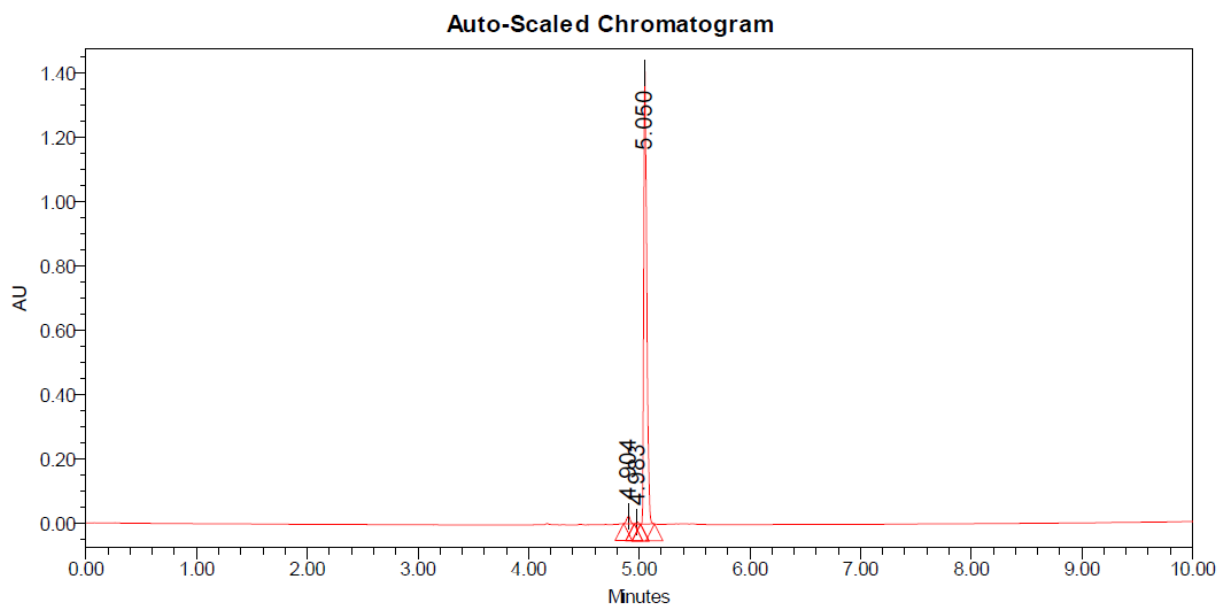

**Processed Channel:  
PDA 254.0 nm**

|   | Retention Time (min) | Area    | % Area |
|---|----------------------|---------|--------|
| 1 | 4.904                | 53922   | 1.97   |
| 2 | 4.983                | 8661    | 0.32   |
| 3 | 5.050                | 2670582 | 97.71  |



**Figure S6.** UPLC analysis of compound **12**.

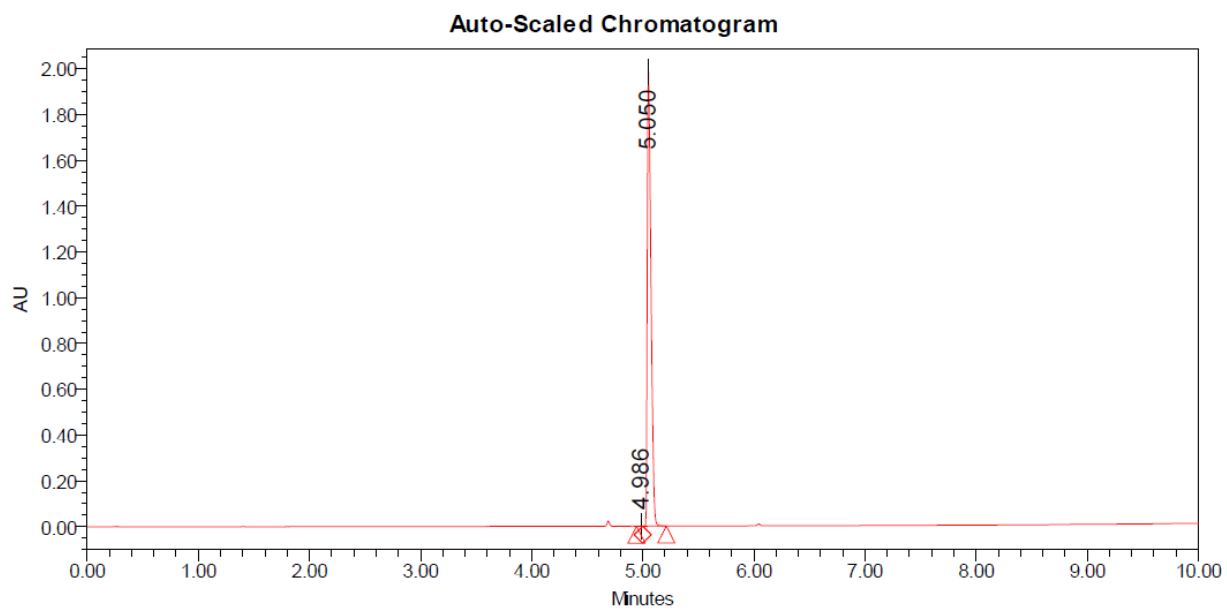

**Processed Channel:  
PDA 254.0 nm**

|   | Retention Time (min) | Area    | % Area |
|---|----------------------|---------|--------|
| 1 | 4.986                | 780     | 0.02   |
| 2 | 5.050                | 4613662 | 99.98  |

**Figure S7.** UPLC analysis of compound **13**.

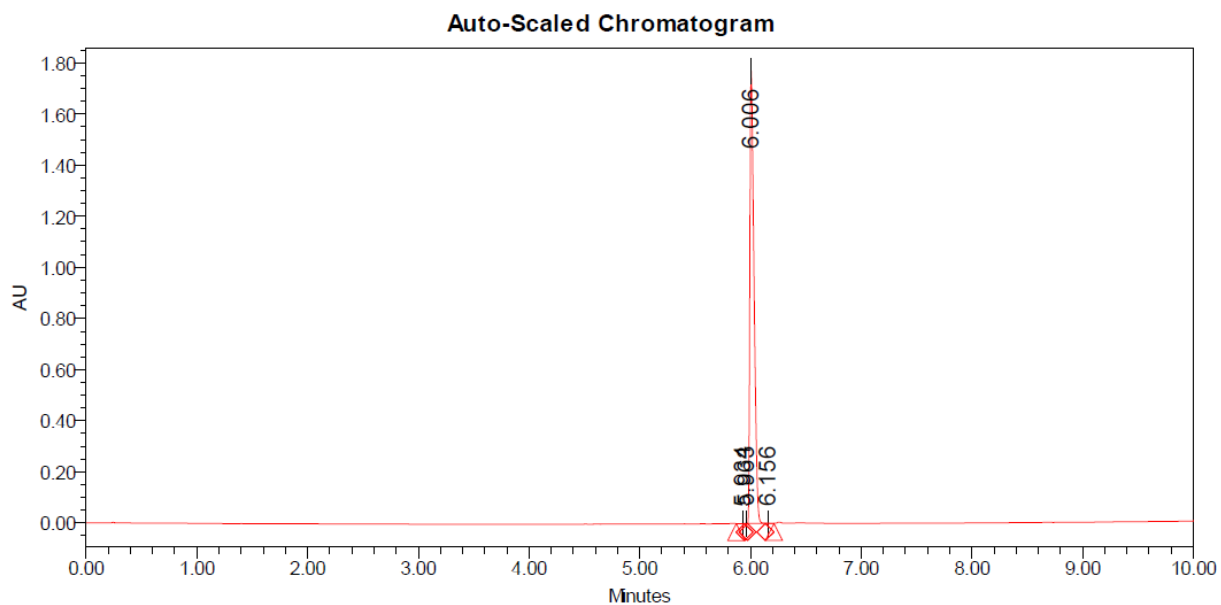

**Processed Channel:  
PDA 254.0 nm**

|   | Retention Time (min) | Area    | % Area |
|---|----------------------|---------|--------|
| 1 | 5.934                | 1846    | 0.04   |
| 2 | 5.963                | 1192    | 0.03   |
| 3 | 6.006                | 4592906 | 99.91  |
| 4 | 6.156                | 1158    | 0.03   |

**Figure S8.** UPLC analysis of compound **14**.

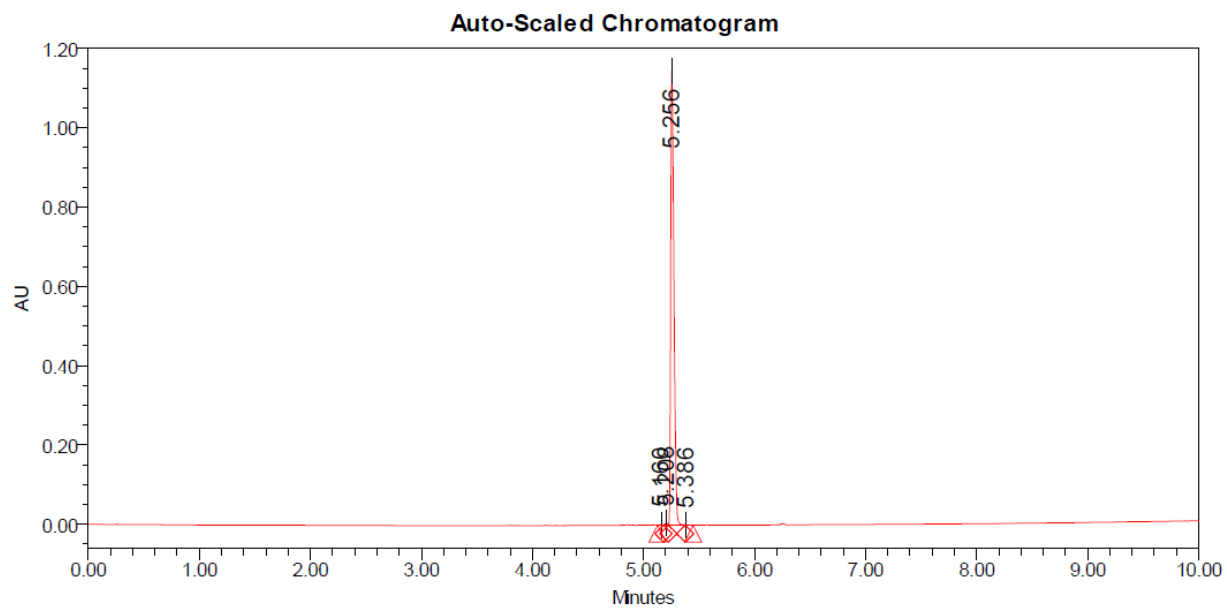

**Processed Channel:  
PDA 254.0 nm**

|   | Retention Time (min) | Area    | % Area |
|---|----------------------|---------|--------|
| 1 | 5.160                | 2135    | 0.09   |
| 2 | 5.208                | 8207    | 0.36   |
| 3 | 5.256                | 2253195 | 99.49  |
| 4 | 5.386                | 1258    | 0.06   |

**Figure S9.** UPLC analysis of compound **15**.

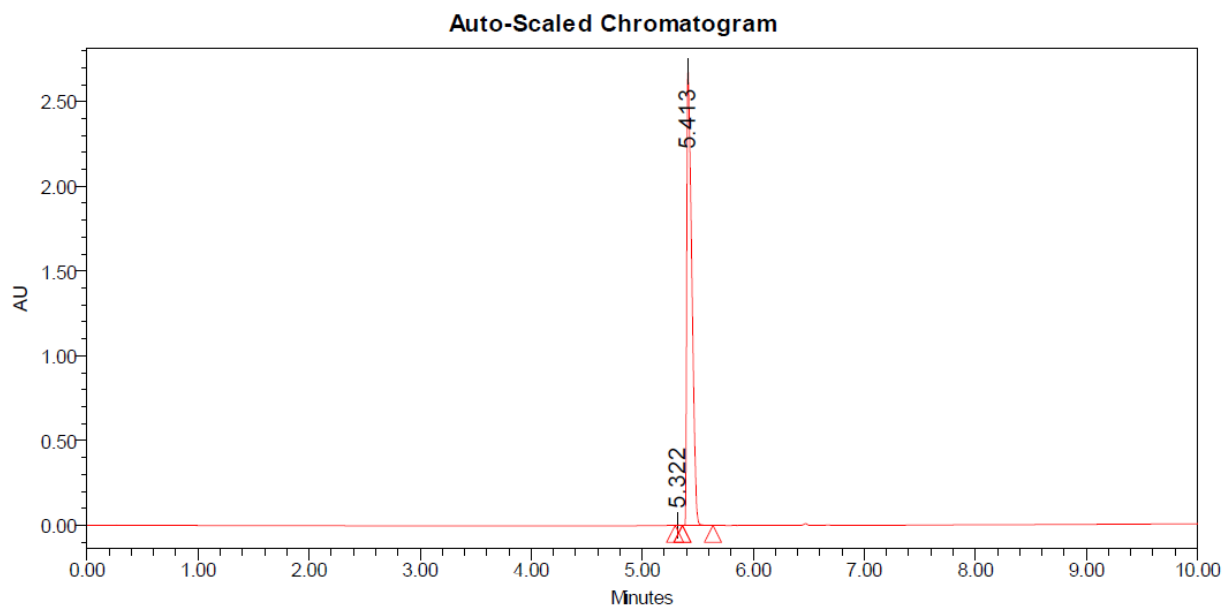

**Processed Channel:  
PDA 254.0 nm**

|   | Retention Time (min) | Area    | % Area |
|---|----------------------|---------|--------|
| 1 | 5.322                | 3412    | 0.04   |
| 2 | 5.413                | 8442254 | 99.96  |

**Figure S10.** UPLC analysis of compound **16**.

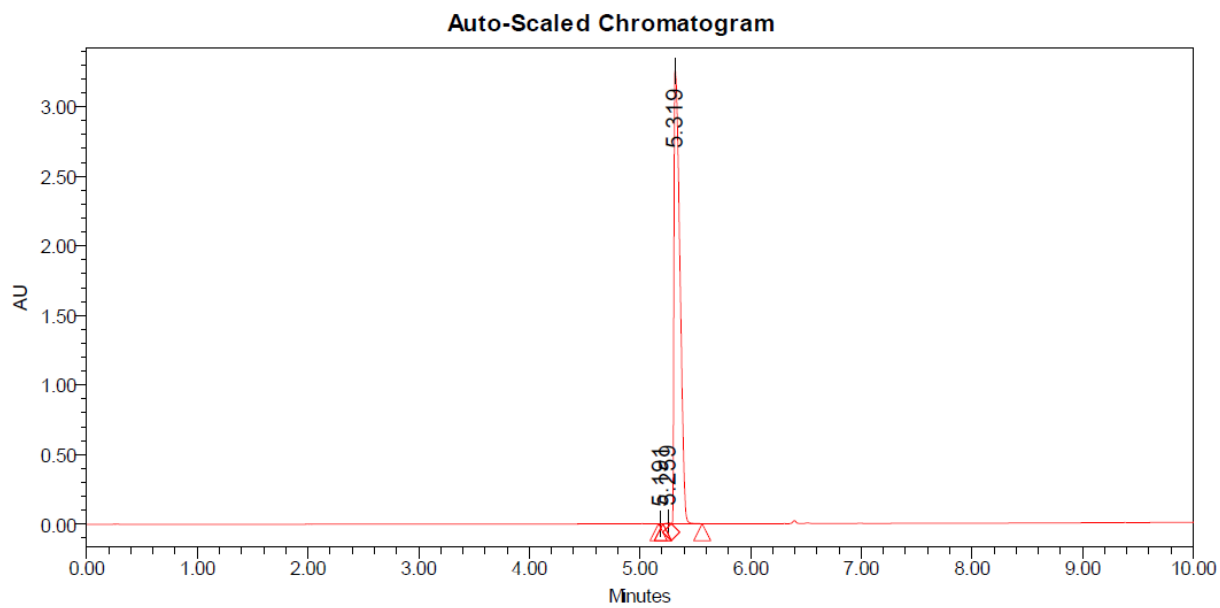

**Processed Channel:  
PDA 254.0 nm**

|   | Retention Time (min) | Area     | % Area |
|---|----------------------|----------|--------|
| 1 | 5.191                | 224      | 0.00   |
| 2 | 5.259                | 11709    | 0.10   |
| 3 | 5.319                | 12105593 | 99.90  |

## References:

1. Davis, I. W.; Leaver-Fay, A.; Chen, V. B.; Block, J. N.; Kapral, G. J.; Wang, X.; Murray, L. W.; Arendall, W. B., 3rd; Snoeyink, J.; Richardson, J. S.; Richardson, D. C. MolProbity: all-atom contacts and structure validation for proteins and nucleic acids. *Nucleic Acids Res* **2007**, 35, W375-83.
2. Kleywegt, G. J.; Harris, M. R.; Zou, J. Y.; Taylor, T. C.; Wahlby, A.; Jones, T. A. The Uppsala Electron-Density Server. *Acta Crystallogr D Biol Crystallogr* **2004**, 60, 2240-9.
